# Supplementary material for: Structural investigation of the A-site vacancy in scheelites and the luminescence behavior of two continuous solid solutions A1–1.5xEux□0.5xWO4 and A0.64–0.5yEu0.24Liy□0.12–0.5yWO4 (A = Ca, Sr; □ = vacancy)
Source: Royal Society of Chemistry journal article supplement (doi:10.1039/c5dt00022j), 2015-01-01
Supplement: c5dt00022j1.pdf [file c5dt00022j1.pdf]

Electronic Supplementary Information for

Structural investigation of the *A*-site vacancy in Scheelites and the  
luminescence behaviors of two continuous solid solutions  $A_{1-1.5x}Eu_x\Box_{0.5x}WO_4$  and  $A_{0.64-0.5y}Eu_{0.24}Li_y\Box_{0.12-0.5y}WO_4$  ( $A = Ca, Sr; \Box =$   
vacancy)

*Pengfei Jiang, Wenliang Gao, Rihong Cong,\* and Tao Yang\**

College of Chemistry and Chemical Engineering, Chongqing University, Chongqing  
400044, P. R. China

\*Correspondence authors, Email: [congrihong@cqu.edu.cn](mailto:congrihong@cqu.edu.cn) and [taoyang@cqu.edu.cn](mailto:taoyang@cqu.edu.cn); Tel:

(8623)65105065, Fax: (8623)65105065.

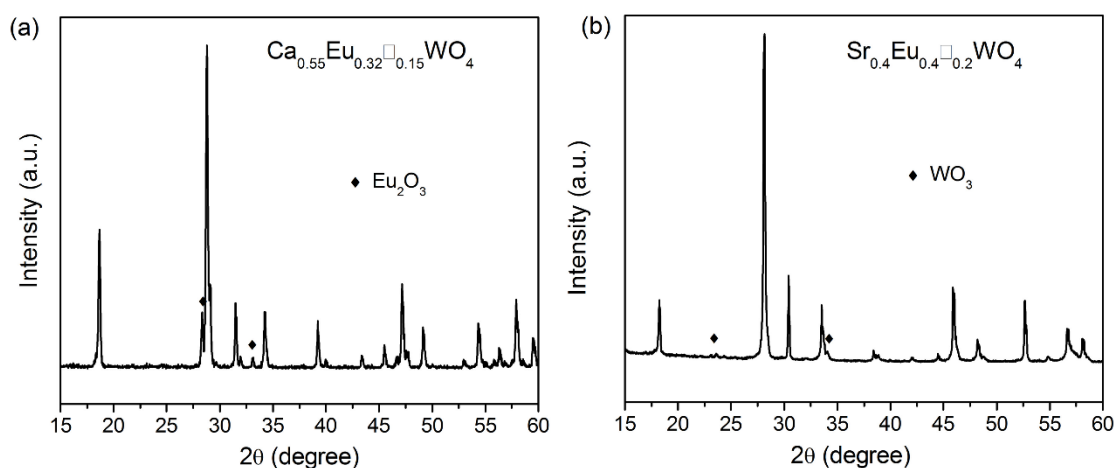

Fig. S1 XRD patterns for “ $\text{Ca}_{0.55}\text{Eu}_{0.32}\square_{0.15}\text{WO}_4$ ” and “ $\text{Sr}_{0.4}\text{Eu}_{0.4}\square_{0.2}\text{WO}_4$ ” samples prepared by high temperature solid state reactions. Other than the major phase of Scheelite, minor impurity peaks appear as marked in above figures, either belong to  $\text{Eu}_2\text{O}_3$  or  $\text{WO}_3$ . There supposed to be other impurities, however, probably their diffraction peaks are overlapped with the major phase, it is hard to identify all of them. Nevertheless, our experiments show that the assumed compositions “ $\text{Ca}_{0.55}\text{Eu}_{0.32}\square_{0.15}\text{WO}_4$ ” and “ $\text{Sr}_{0.4}\text{Eu}_{0.4}\square_{0.2}\text{WO}_4$ ” cannot be annealed to be phase-pure.

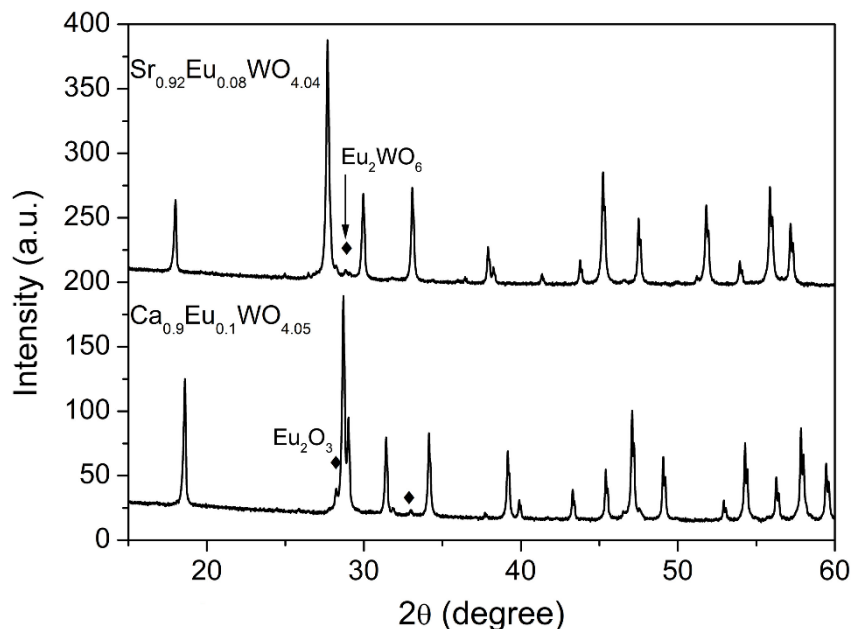

Fig. S2 XRD patterns of  $\text{Sr}_{0.92}\text{Eu}_{0.08}\text{WO}_{4.04}$  and  $\text{Ca}_{0.90}\text{Eu}_{0.10}\text{WO}_{4.05}$ . The dark diamond in the figure represents the diffraction peaks of the impurity phases.

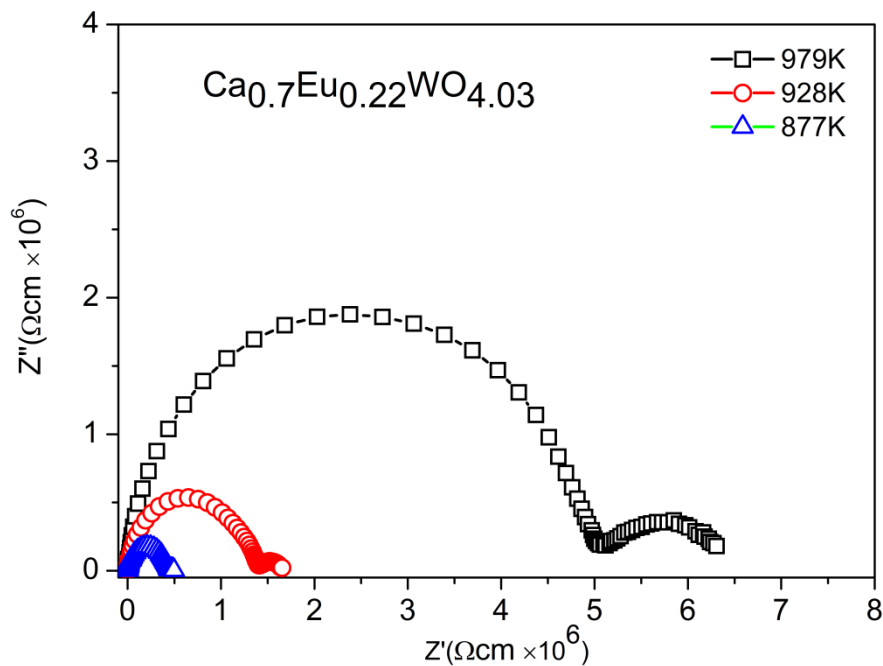

Fig. S3 Complex AC impedance spectra at 600, 650 and 705 °C, which comprise one broad and one narrow semi-circles. The broad and narrow semi-circle assign to the bulk and grain boundary contribution, respectively, and no electrode response or ionic conductivity was observed.

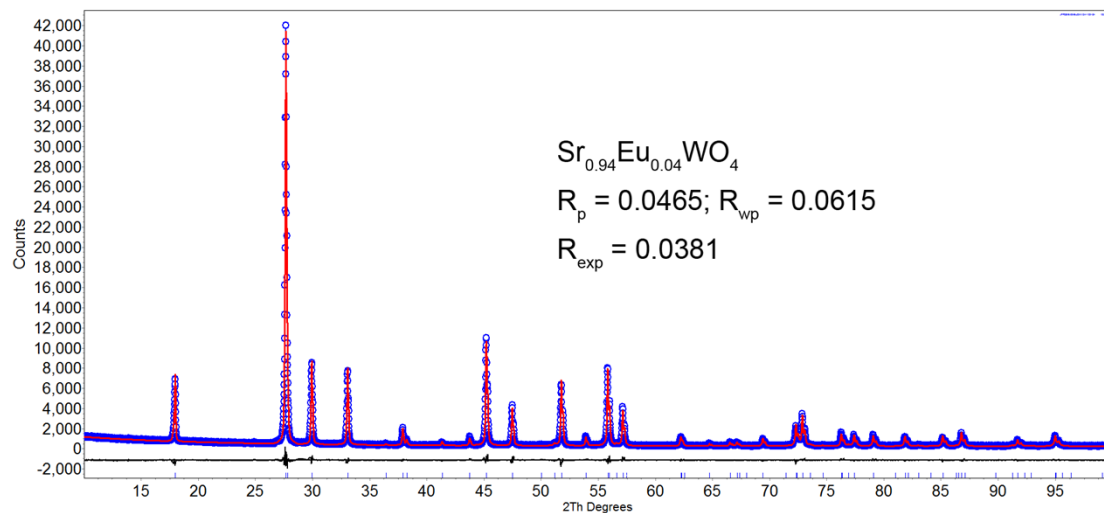

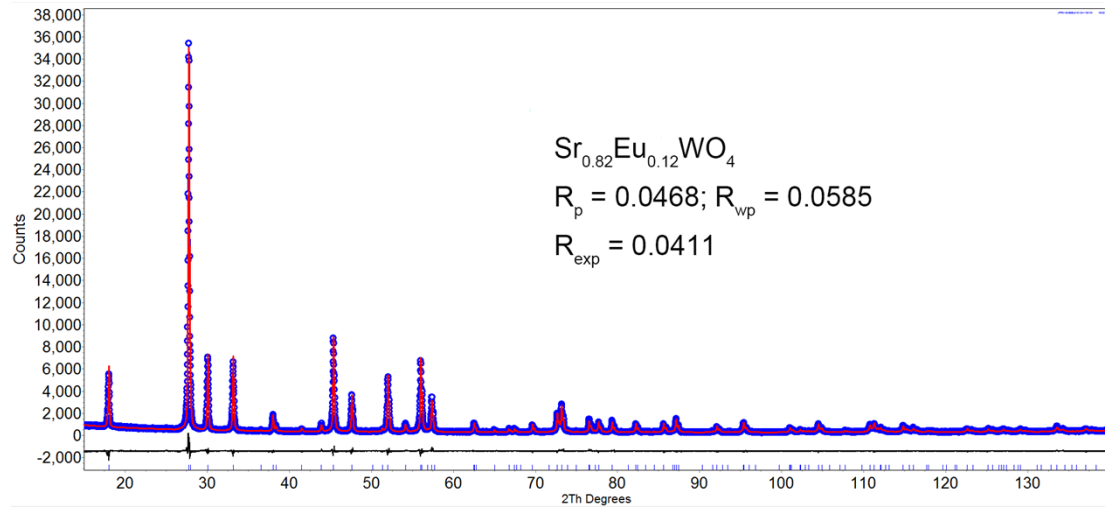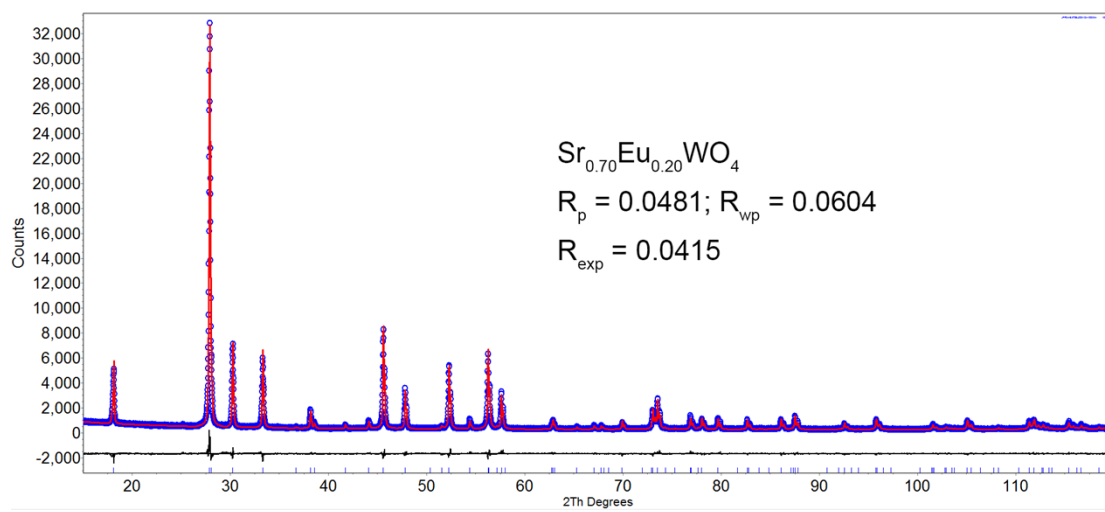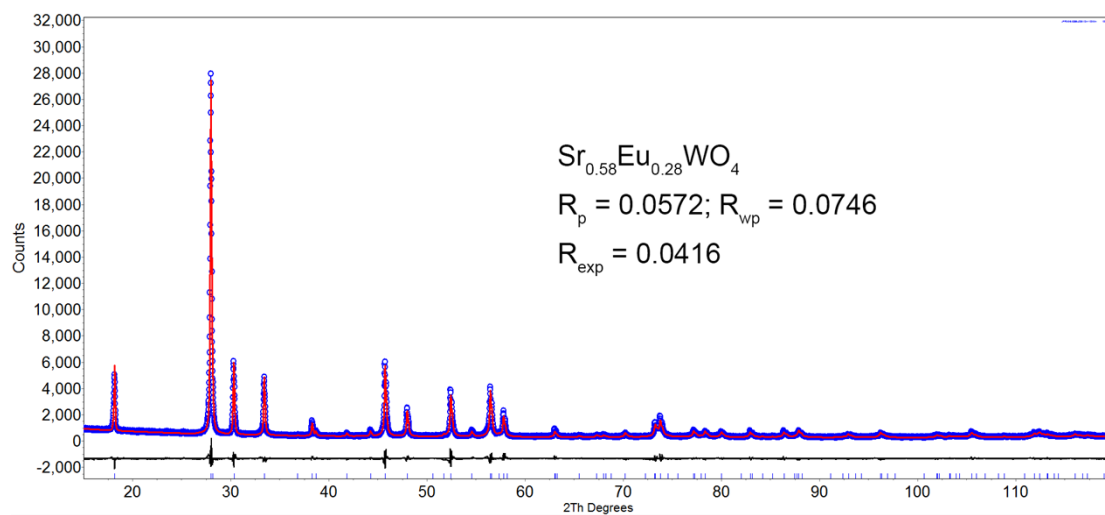

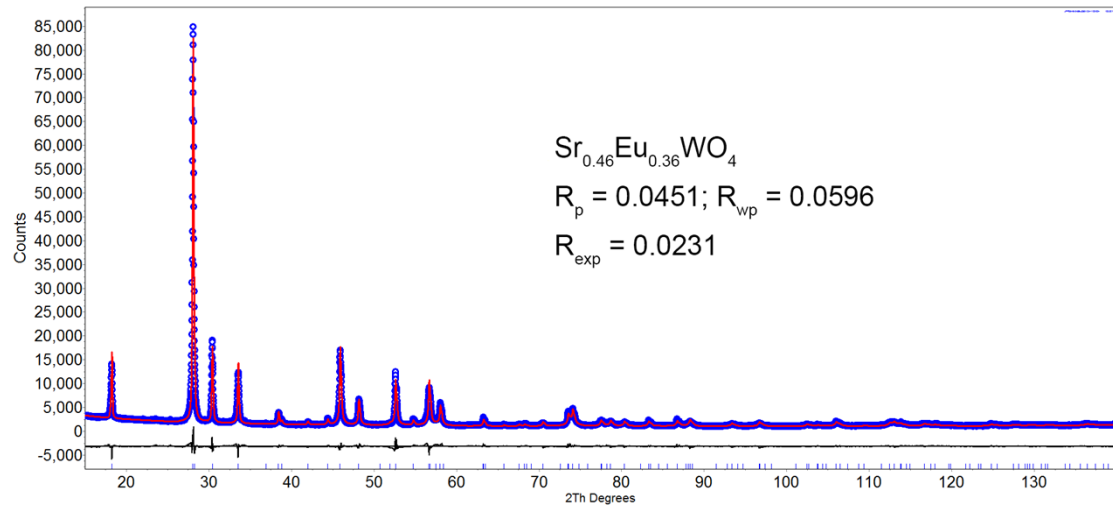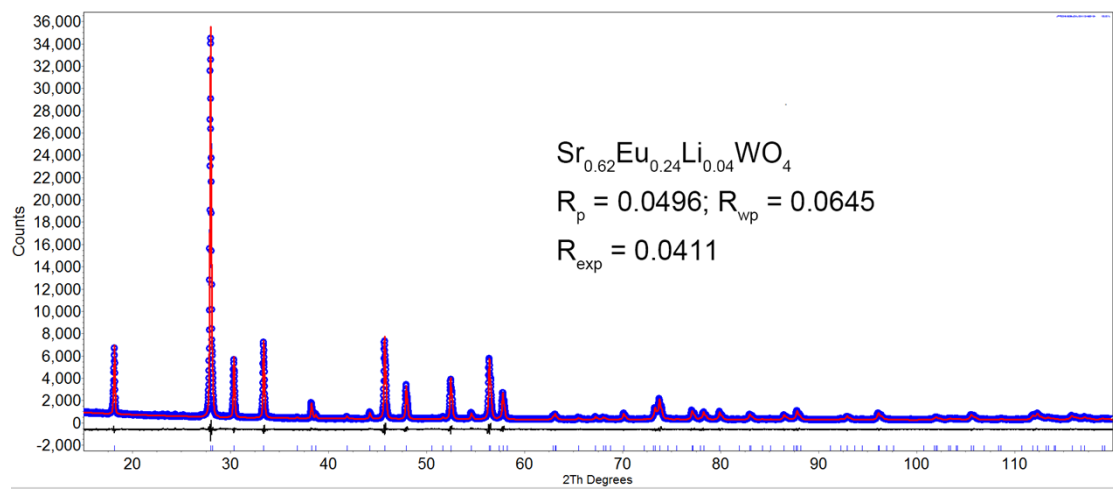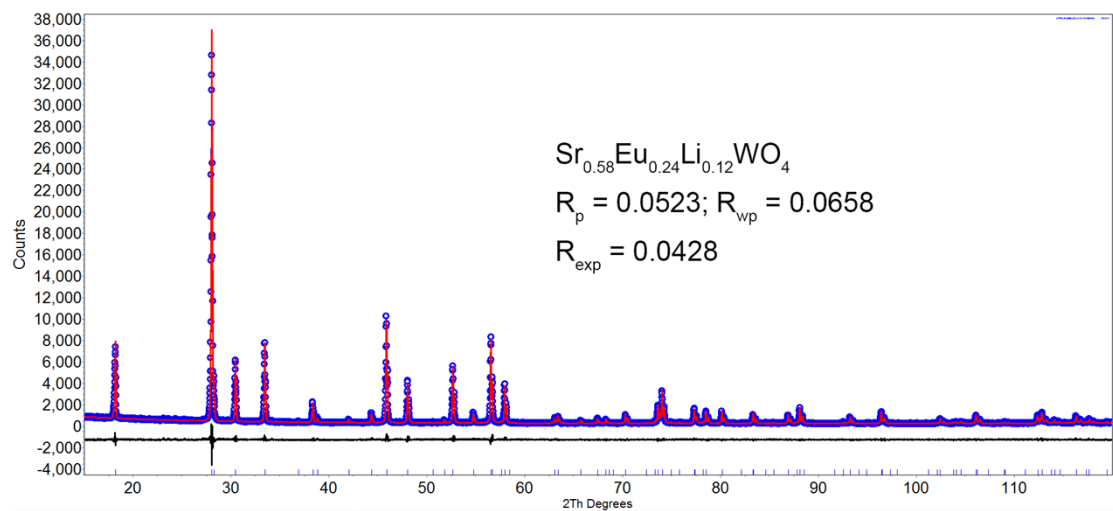

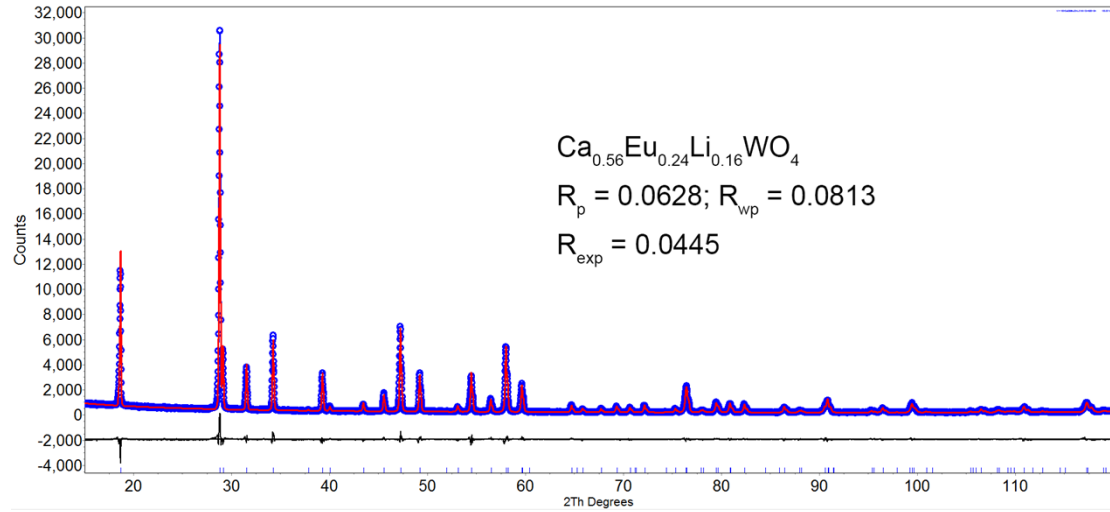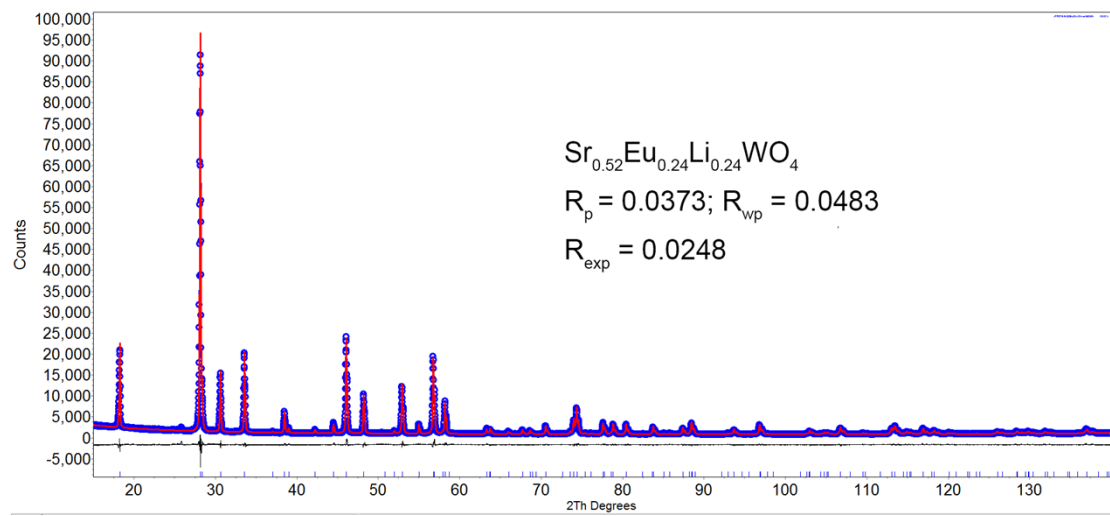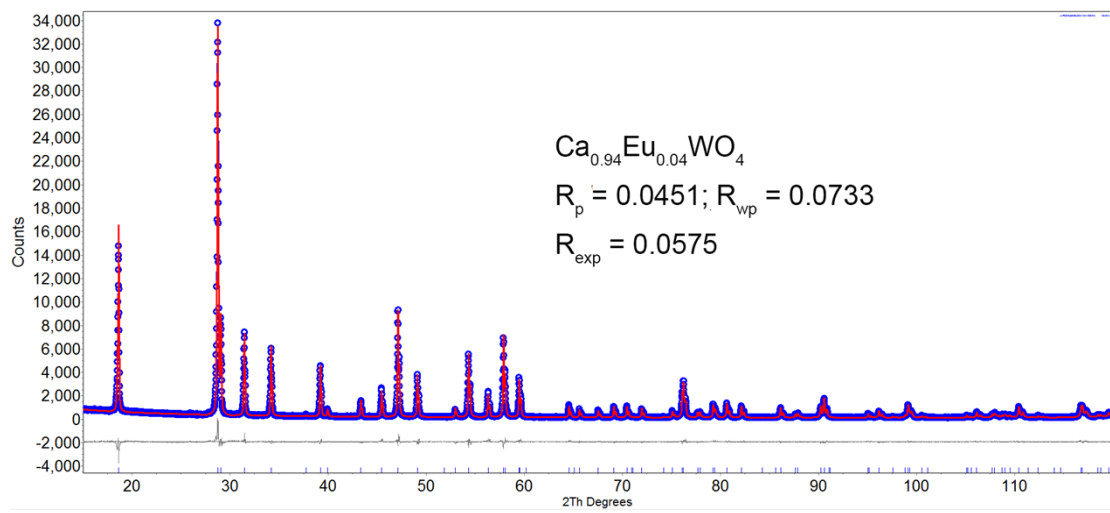

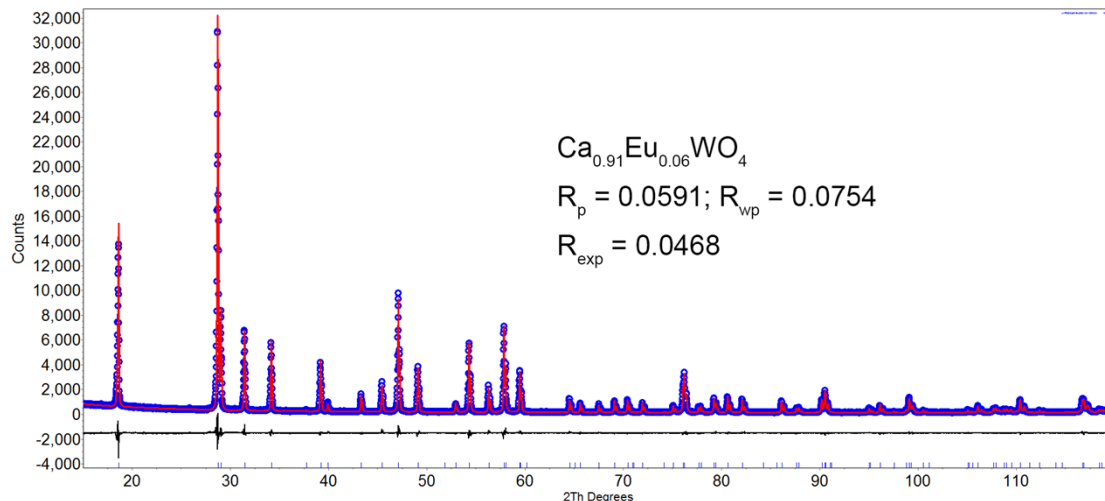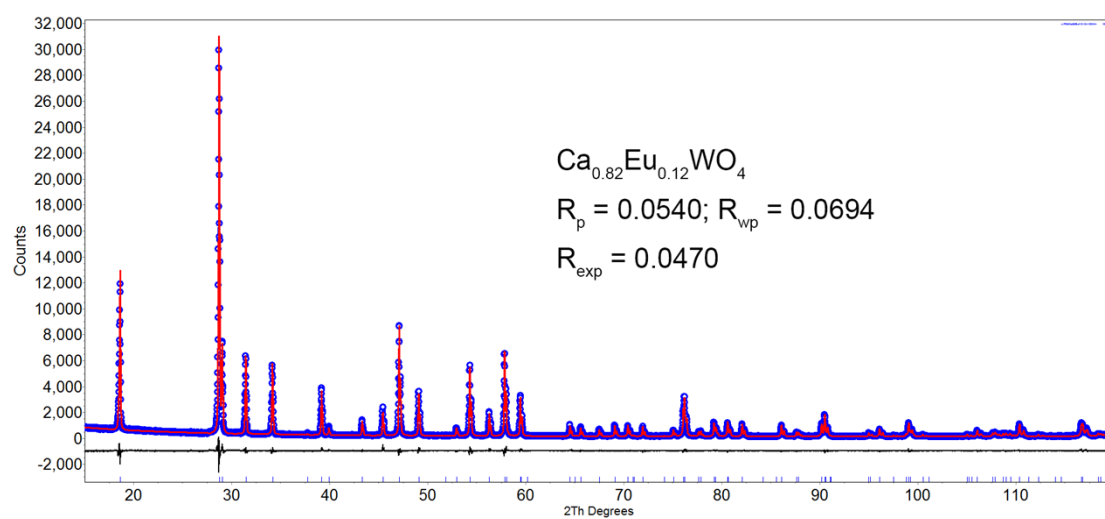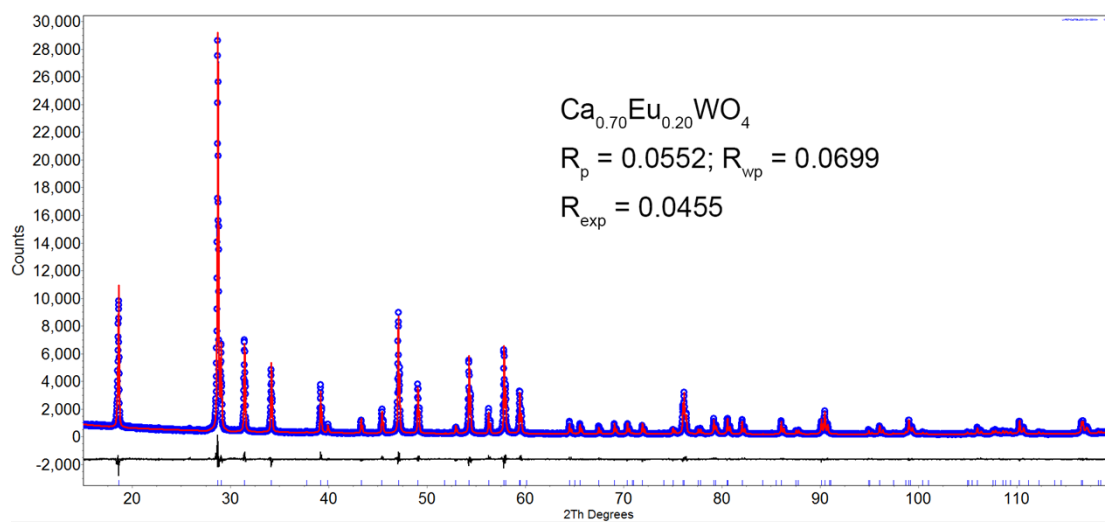

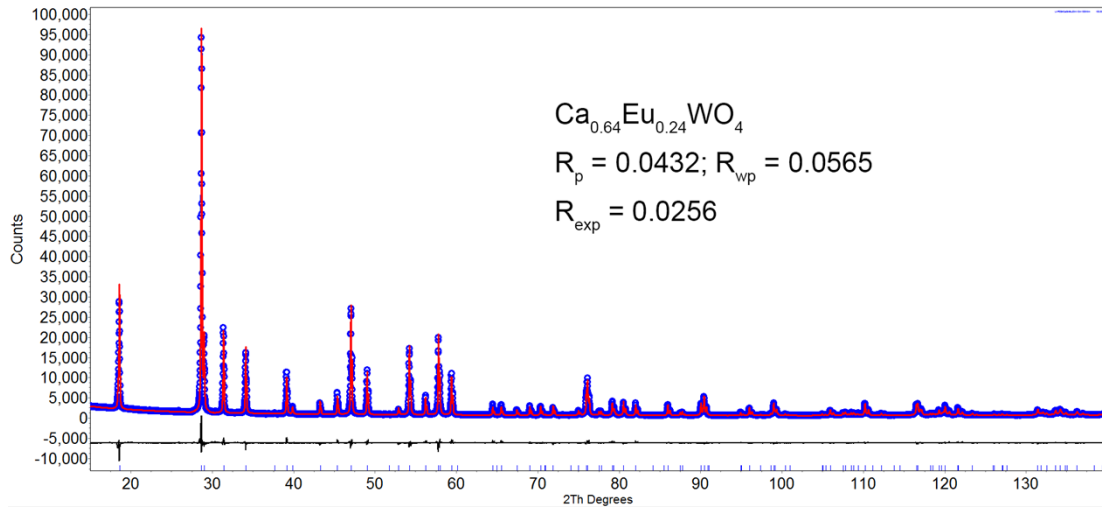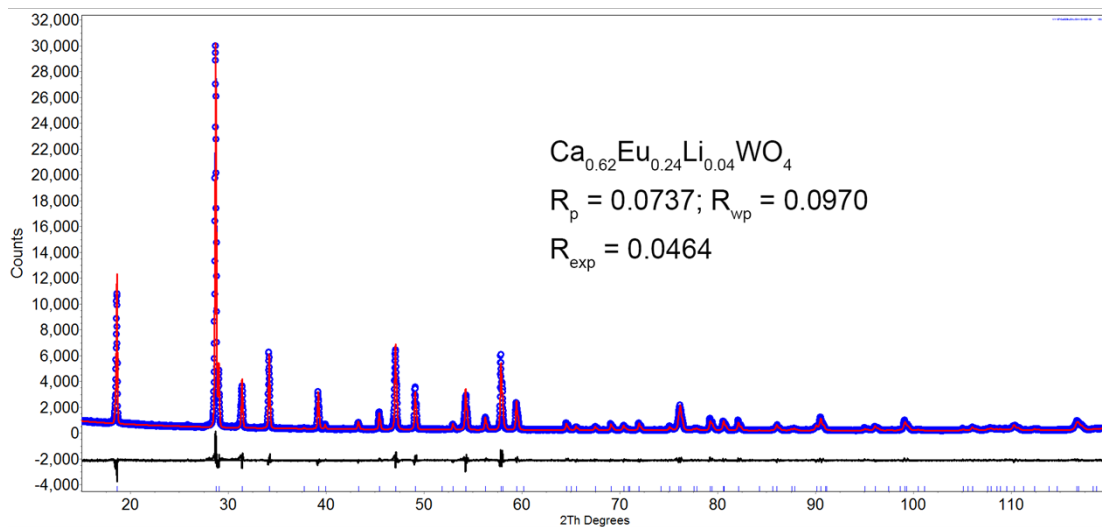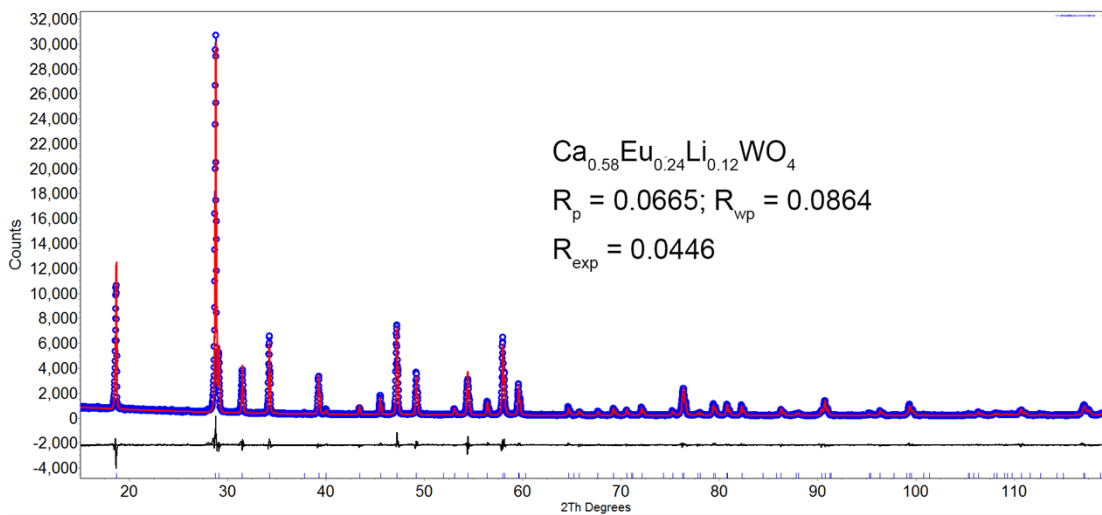



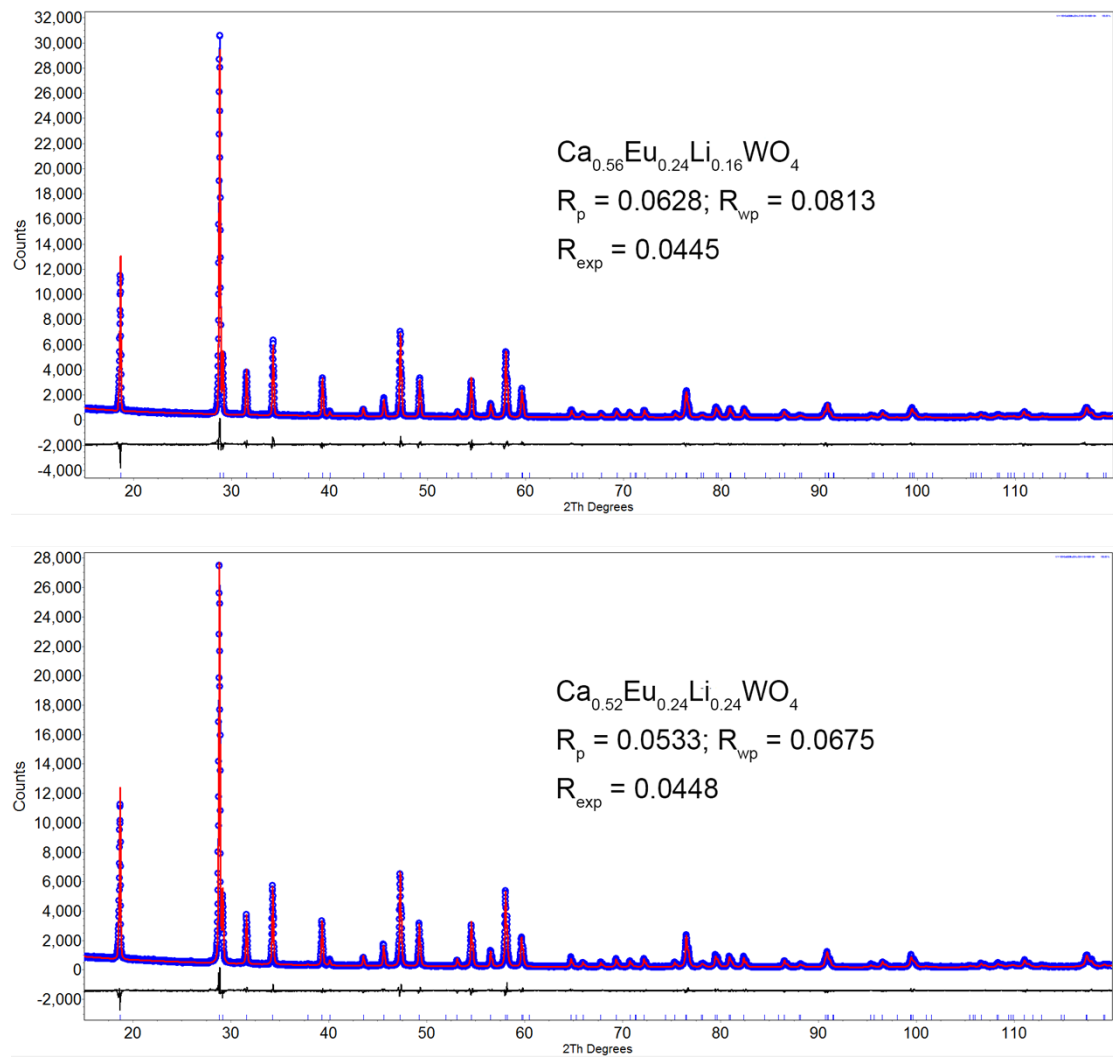

Fig. S4 The final Rietveld refinement patterns of the selected samples for  $\text{Sr}_{1-1.5x}\text{Eu}_x\text{□}_{0.5x}\text{WO}_4$  ( $x = 0.04, 0.12, 0.20, 0.28, 0.36$ ),  $\text{Sr}_{0.64-0.5y}\text{Eu}_{0.24}\text{Li}_y\text{□}_{0.12-0.5y}\text{WO}_4$  ( $y = 0.04, 0.12, 0.16, 0.24$ ),  $\text{Ca}_{1-1.5x}\text{Eu}_x\text{□}_{0.5x}\text{WO}_4$  ( $x = 0.04, 0.06, 0.12, 0.20, 0.24$ ) and  $\text{Ca}_{0.64-0.5y}\text{Eu}_{0.24}\text{Li}_y\text{□}_{0.12-0.5y}\text{WO}_4$  ( $y = 0.04, 0.12, 0.16, 0.24$ ). The molecular formula and agreement factors were given in the inserts.

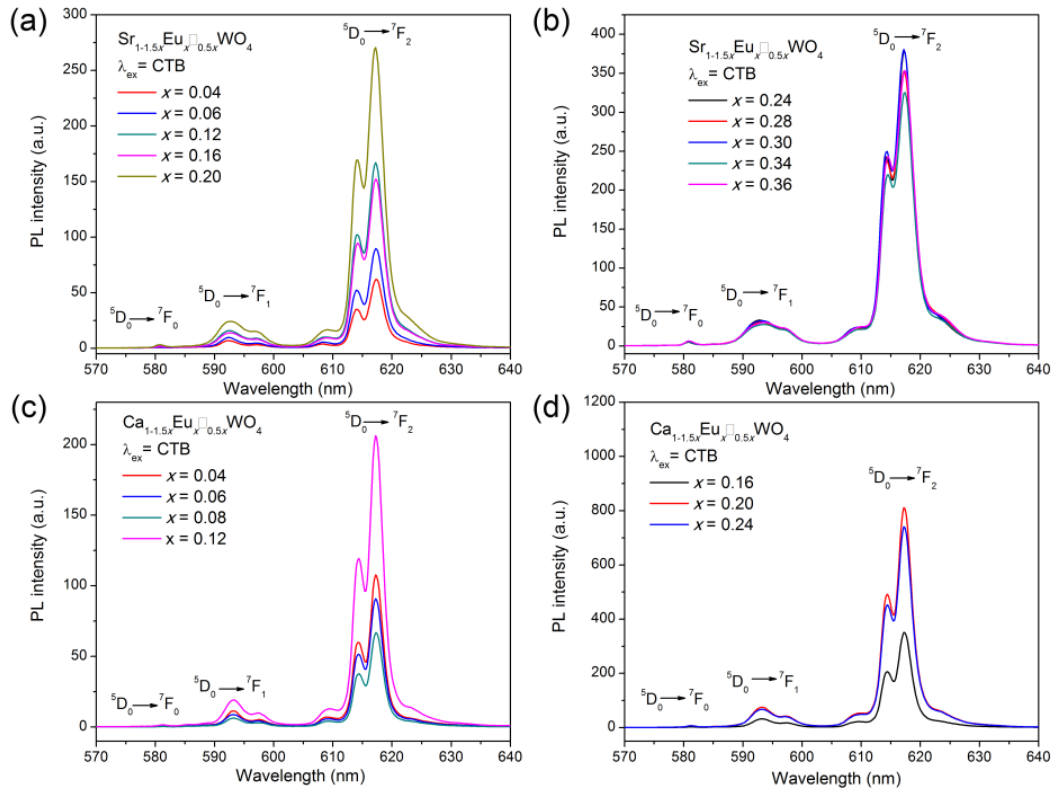

Fig. S5 The emission spectra of SEW and CEW excited at 274 nm (CT band of  $O^{2-} \rightarrow W^{6+}$ ).

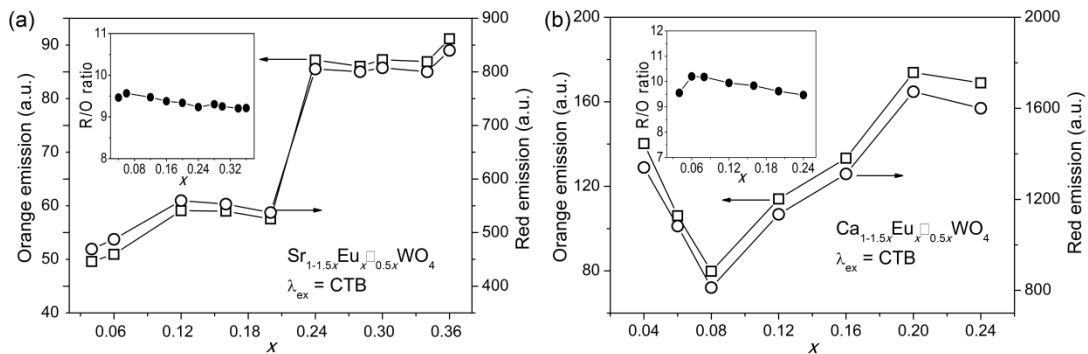

Fig. S6 The emission intensities of (a) SEW and (b) CEW depend on  $Eu^{3+}$  content under 270 nm excitation. The insert of (a) and (b) gives the R/O values.

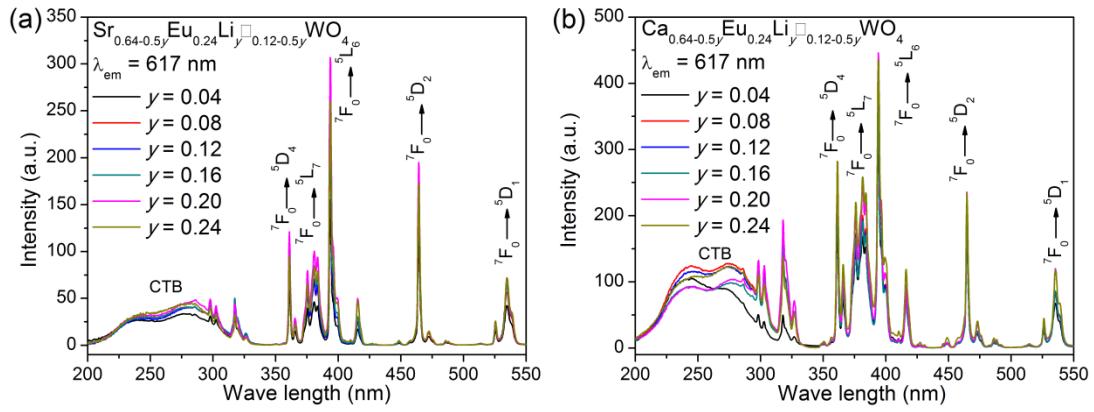

Fig. S7 Excitation spectra of (a) SELW and (b) CELW, which were measured from 200 to 550 nm by monitoring the strongest emission of  $\text{Eu}^{3+}$  at 617 nm.

Table S1 The final atomic coordinates, isotropic factors and occupancies of the selected samples obtained by Rietveld refinement.

| Formula                           | Sr <sub>0.94</sub> Eu <sub>0.04</sub> WO <sub>4</sub> |          |           | Sr <sub>0.82</sub> Eu <sub>0.12</sub> WO <sub>4</sub> |          |           |
|-----------------------------------|-------------------------------------------------------|----------|-----------|-------------------------------------------------------|----------|-----------|
| Atom                              | Sr/Eu                                                 | W        | O         | Sr/Eu                                                 | W        | O         |
| <i>x</i>                          | 0                                                     | 0        | 0.247(1)  | 0                                                     | 0        | 0.2502(8) |
| <i>y</i>                          | 0                                                     | 0        | 0.1468(8) | 0                                                     | 0        | 0.1495(7) |
| <i>z</i>                          | 0.5                                                   | 0        | 0.0825(4) | 0.5                                                   | 0        | 0.0833(4) |
| Occ.                              | 0.998(3)/0.04                                         | 1        | 1         | 0.903(3)/0.12                                         | 1        | 1         |
| B <sub>eq</sub> (Å <sup>2</sup> ) | 0.178(3)                                              | 0.010(1) | 0.011(3)  | 0.011(8)                                              | 0.006(6) | 0.004(1)  |

  

| Formula                           | Sr <sub>0.70</sub> Eu <sub>0.20</sub> WO <sub>4</sub> |          |           | Sr <sub>0.58</sub> Eu <sub>0.28</sub> WO <sub>4</sub> |          |           |
|-----------------------------------|-------------------------------------------------------|----------|-----------|-------------------------------------------------------|----------|-----------|
| Atom                              | Sr/Eu                                                 | W        | O         | Sr/Eu                                                 | W        | O         |
| <i>x</i>                          | 0                                                     | 0        | 0.251(1)  | 0                                                     | 0        | 0.256(1)  |
| <i>y</i>                          | 0                                                     | 0        | 0.1507(8) | 0                                                     | 0        | 0.158(2)  |
| <i>z</i>                          | 0.5                                                   | 0        | 0.0845(4) | 0.5                                                   | 0        | 0.0810(6) |
| Occ.                              | 0.784(4)/0.20                                         | 1        | 1         | 0.645(5)/0.28                                         | 1        | 1         |
| B <sub>eq</sub> (Å <sup>2</sup> ) | 0.014(1)                                              | 0.007(1) | 0.011(3)  | 0.010(5)                                              | 0.003(4) | 0.013(6)  |

  

| Formula                           | Sr <sub>0.46</sub> Eu <sub>0.36</sub> WO <sub>4</sub> |          |           | Sr <sub>0.62</sub> Eu <sub>0.24</sub> Li <sub>0.04</sub> WO <sub>4</sub> |           |           |
|-----------------------------------|-------------------------------------------------------|----------|-----------|--------------------------------------------------------------------------|-----------|-----------|
| Atom                              | Sr/Eu                                                 | W        | O         | Sr/Eu/Li                                                                 | W         | O         |
| <i>x</i>                          | 0                                                     | 0        | 0.248(1)  | 0                                                                        | 0         | 0.249(6)  |
| <i>y</i>                          | 0                                                     | 0        | 0.153(1)  | 0                                                                        | 0         | 0.1459(9) |
| <i>z</i>                          | 0.5                                                   | 0        | 0.0833(4) | 0.5                                                                      | 0         | 0.0844(5) |
| Occ.                              | 0.575(4)/0.36                                         | 1        | 1         | 0.672(4)/0.24/0.04                                                       | 1         | 1         |
| B <sub>eq</sub> (Å <sup>2</sup> ) | 0.011(3)                                              | 0.005(1) | 0.003(3)  | 0.015(1)                                                                 | 0.0114(8) | 0.023(3)  |

  

| Formula                           | Sr <sub>0.58</sub> Eu <sub>0.24</sub> Li <sub>0.12</sub> WO <sub>4</sub> |           |           | Sr <sub>0.56</sub> Eu <sub>0.24</sub> Li <sub>0.16</sub> WO <sub>4</sub> |           |           |
|-----------------------------------|--------------------------------------------------------------------------|-----------|-----------|--------------------------------------------------------------------------|-----------|-----------|
| Atom                              | Sr/Eu/Li                                                                 | W         | O         | Sr/Eu/Li                                                                 | W         | O         |
| <i>x</i>                          | 0                                                                        | 0         | 0.2510(9) | 0                                                                        | 0         | 0.2514(9) |
| <i>y</i>                          | 0                                                                        | 0         | 0.1450(9) | 0                                                                        | 0         | 0.1490(9) |
| <i>z</i>                          | 0.5                                                                      | 0         | 0.0859(4) | 0.5                                                                      | 0         | 0.0859(4) |
| Occ.                              | 0.586(3)/0.24/0.12                                                       | 1         | 1         | 0.602(3)/0.24/0.16                                                       | 1         | 1         |
| B <sub>eq</sub> (Å <sup>2</sup> ) | 0.0136(9)                                                                | 0.0140(8) | 0.022(2)  | 0.0147(9)                                                                | 0.0132(8) | 0.019(3)  |

  

| Formula                           | Sr <sub>0.52</sub> Eu <sub>0.24</sub> Li <sub>0.24</sub> WO <sub>4</sub> |           |           | Ca <sub>0.94</sub> Eu <sub>0.04</sub> WO <sub>4</sub> |           |           |
|-----------------------------------|--------------------------------------------------------------------------|-----------|-----------|-------------------------------------------------------|-----------|-----------|
| Atom                              | Sr/Eu/Li                                                                 | W         | O         | Ca/Eu                                                 | W         | O         |
| <i>x</i>                          | 0                                                                        | 0         | 0.2549(7) | 0                                                     | 0         | 0.2557(7) |
| <i>y</i>                          | 0                                                                        | 0         | 0.148(1)  | 0                                                     | 0         | 0.1558(7) |
| <i>z</i>                          | 0.5                                                                      | 0         | 0.0862(3) | 0.5                                                   | 0         | 0.0838(3) |
| Occ.                              | 0.553(2)/0.24/0.24                                                       | 1         | 1         | 1.053(4)/0.04                                         | 1         | 1         |
| B <sub>eq</sub> (Å <sup>2</sup> ) | 0.0104(6)                                                                | 0.0121(4) | 0.014(1)  | 0.0175(8)                                             | 0.0061(5) | 0.009(1)  |

| Formula                       | $\text{Ca}_{0.91}\text{Eu}_{0.06}\text{WO}_4$ |           |           | $\text{Ca}_{0.82}\text{Eu}_{0.12}\text{WO}_4$ |           |           |
|-------------------------------|-----------------------------------------------|-----------|-----------|-----------------------------------------------|-----------|-----------|
| Atom                          | Ca/Eu                                         | W         | O         | Ca/Eu                                         | W         | O         |
| <i>x</i>                      | 0                                             | 0         | 0.2565(7) | 0                                             | 0         | 0.2587(8) |
| <i>y</i>                      | 0                                             | 0         | 0.1570(8) | 0                                             | 0         | 0.1561(8) |
| <i>z</i>                      | 0.5                                           | 0         | 0.0843(3) | 0.5                                           | 0         | 0.0846(3) |
| Occ.                          | 0.956(5)/0.06                                 | 1         | 1         | 0.857(5)/0.12                                 | 1         | 1         |
| $B_{\text{eq}}(\text{\AA}^2)$ | 0.0134(8)                                     | 0.0055(5) | 0.014(1)  | 0.0132(8)                                     | 0.0061(5) | 0.013(1)  |

  

| Formula                       | $\text{Ca}_{0.70}\text{Eu}_{0.20}\text{WO}_4$ |           |           | $\text{Ca}_{0.64}\text{Eu}_{0.24}\text{WO}_4$ |           |           |
|-------------------------------|-----------------------------------------------|-----------|-----------|-----------------------------------------------|-----------|-----------|
| Atom                          | Ca/Eu                                         | W         | O         | Ca/Eu                                         | W         | O         |
| <i>x</i>                      | 0                                             | 0         | 0.2579(8) | 0                                             | 0         | 0.2604(7) |
| <i>y</i>                      | 0                                             | 0         | 0.1615(8) | 0                                             | 0         | 0.1639(7) |
| <i>z</i>                      | 0.5                                           | 0         | 0.0833(4) | 0.5                                           | 0         | 0.0828(3) |
| Occ.                          | 0.753(5)/0.20                                 | 1         | 1         | 0.720(4)/0.24                                 | 1         | 1         |
| $B_{\text{eq}}(\text{\AA}^2)$ | 0.0143(9)                                     | 0.0075(8) | 0.010(1)  | 0.0138(5)                                     | 0.0056(4) | 0.015(1)  |

  

| Formula                       | $\text{Ca}_{0.62}\text{Eu}_{0.24}\text{Li}_{0.04}\text{WO}_4$ |           |           | $\text{Ca}_{0.58}\text{Eu}_{0.24}\text{Li}_{0.12}\text{WO}_4$ |           |           |
|-------------------------------|---------------------------------------------------------------|-----------|-----------|---------------------------------------------------------------|-----------|-----------|
| Atom                          | Ca/Eu/Li                                                      | W         | O         | Ca/Eu/Li                                                      | W         | O         |
| <i>x</i>                      | 0                                                             | 0         | 0.255(1)  | 0                                                             | 0         | 0.260(1)  |
| <i>y</i>                      | 0                                                             | 0         | 0.156(1)  | 0                                                             | 0         | 0.156(1)  |
| <i>z</i>                      | 0.5                                                           | 0         | 0.0852(6) | 0.5                                                           | 0         | 0.0862(5) |
| Occ.                          | 0.757(7)/0.24/0.04                                            | 1         | 1         | 0.700(7)/0.24/0.12                                            | 1         | 1         |
| $B_{\text{eq}}(\text{\AA}^2)$ | 0.0198(8)                                                     | 0.0082(5) | 0.011(3)  | 0.0222(9)                                                     | 0.0119(6) | 0.016(3)  |

  

| Formula                       | $\text{Ca}_{0.56}\text{Eu}_{0.24}\text{Li}_{0.16}\text{WO}_4$ |           |           | $\text{Ca}_{0.52}\text{Eu}_{0.24}\text{Li}_{0.24}\text{WO}_4$ |           |           |
|-------------------------------|---------------------------------------------------------------|-----------|-----------|---------------------------------------------------------------|-----------|-----------|
| Atom                          | Ca/Eu/Li                                                      | W         | O         | Ca/Eu/Li                                                      | W         | O         |
| <i>x</i>                      | 0                                                             | 0         | 0.2572(9) | 0                                                             | 0         | 0.2555(7) |
| <i>y</i>                      | 0                                                             | 0         | 0.156(1)  | 0                                                             | 0         | 0.1563(8) |
| <i>z</i>                      | 0.5                                                           | 0         | 0.0868(5) | 0.5                                                           | 0         | 0.0867(4) |
| Occ.                          | 0.680(6)/0.24/0.16                                            | 1         | 1         | 0.621(5)/0.24/0.24                                            | 1         | 1         |
| $B_{\text{eq}}(\text{\AA}^2)$ | 0.0209(9)                                                     | 0.0103(5) | 0.015(3)  | 0.0160(9)                                                     | 0.0055(6) | 0.009(1)  |
